# Supplementary material
Source: publisher site journal article supplement (https://www.dovepress.com/article/392155)
Supplement: Supplementary file 1 [file get_supplementary_file.php]

## **Supplementary material**

## **Methods:**

#### Inclusion criteria:

For inclusion in the study, participants had to fulfil the following criteria**:**

1. Participants were willing and able to give written informed consent by signing an IRB-approved ICF and to follow the restrictions and procedures outlined for the study. The ICF process is described in Section 3.1.3.
2. Healthy adult males or females as determined by medical history, physical examination, and laboratory tests. Participants aged between 18 to 45 years old (inclusive) at the time of signing informed consent. Subject was a Han Chinese who was born in China (including Hong Kong) with Han Chinese parents and grandparents who were born in China (including Hong Kong).
3. Had a body mass index (BMI) between 19 and 24 kg/m2 inclusive and weighed at least 50 kg and no more than 100 kg.
4. Medically healthy participants with clinically insignificant screening results (eg, laboratory profiles, medical histories, ECGs, physical examination). Hemoglobin was greater than the lower limit of normal. A 12-lead ECG with QTc >340 msec and <450 msec.
5. Women of childbearing potential (WOCBP) had a negative urine pregnancy test prior to administration of the IP and used an effective form of birth control (confirmed by the Investigator or designee). Highly effective forms of birth control included: true sexual abstinence, a vasectomized sexual partner, Implanon, female sterilization by tubal occlusion, any effective intrauterine device or intrauterine system (levonorgestrel intrauterine system), Depo-ProveraTM injections, oral contraceptive, and Evra PatchTM or NuvaringTM. All WOCBP agreed to use an effective method of birth control, as defined above, from enrollment throughout the study duration and within 16 weeks (5 half-lives or longer) after the dosing and have had negative serum or urine pregnancy test results on Visit 1 and Visit 2.
6. Women of non-childbearing potential were defined as women who were either permanently sterilized (hysterectomy, bilateral oophorectomy, or bilateral salpingectomy) or who were post-menopausal. Women were considered post-menopausal if they had been amenorrheic for 12 months or more following cessation of exogenous hormonal treatment and had follicle-stimulating hormone (FSH) levels in the post-menopausal range.
7. Male participants were willing to use condoms, in association with another method of contraception, from the day of the first dosing until 16 weeks (5 half-lives or longer) after the dosing.

#### Exclusion criteria:

Any of the following was regarded as a criterion for exclusion from the study:

1 Any subject with a history of cardiovascular, respiratory, hepatic, renal, gastrointestinal, endocrine, or neurological disorder that was capable of altering the metabolism or elimination of drugs or that constituted a risk factor when taking the study medication.

2 Any subject with a documented history of disorders of the immune system at any time.

3 A helminth parasitic infection diagnosed within 24 weeks prior to the date informed consent was obtained that had not been treated with or had failed to respond to standard of care therapy.

4 Malignancy, current or within the past 5 years, except for adequately treated non-invasive basal cell and squamous cell carcinoma of the skin and cervical carcinoma in situ treated with apparent success more than 1 year prior to Visit 1.

5 Any subject with a clinically significant relevant deviation from normal in physical examination, electrocardiography, or clinical laboratory tests, as determined by the Investigator.

6 Any clinically significant findings of chest x-ray or computed tomography (CT) image. If a chest X-ray or CT had not been performed within 6 months prior to screening visit, a chest X-ray was performed before the investigational product administration.

7 Alanine aminotransferase (ALT) or aspartate aminotransferase (AST) level above the upper limit of normal (ULN).

8 Positive result at screening for serum HBsAg, or hepatitis C antibody. Participants with a history of hepatitis B vaccination without history of hepatitis B were allowed to enroll. A history of known immunodeficiency disorder including a positive HIV test.

9 Any subject with any condition resulting in an increased eosinophil count at screening.

10 Any condition requiring the regular use of any medication.

11 Any subject requiring a prescription medication, other than contraceptives. Participants taking non-prescription medications refrained from their use during the inpatient period of the study.

12 Use of immunosuppressive medication (including but not limited to: methotrexate, troleandomycin, cyclosporine, azathioprine, systemic corticosteroid for condition other than short course for NP, or any experimental anti-inflammatory therapy) within 3 months prior to the date informed consent was obtained and during the study period.

13 Receipt of any marketed or investigational biologic (monoclonal or polyclonal antibody) within 4 months or 5 half-lives prior to the date informed consent was obtained, whichever was longer, and during the study period, eg, previous receipt of mepolizumab, reslizumab, dupilumab, or benralizumab.

14 Receipt of immunoglobulin or blood products within 30 days prior to the date informed consent was obtained.

15 Receipt of live attenuated vaccines 30 days prior to the date of informed consent.

16 Any subject with known sensitivity to any constituent of benralizumab or any other IL-5 receptor antagonist. History of anaphylaxis to any biologic therapy.

17 Any subject who had participated in any other study of an IP within either 30 days or 5 half-lives (if known) prior to Visit 1, whichever was longer.

18 Current evidence of drug abuse or history of drug abuse within 1 year of randomization, and/or positive results of drug screen and alcohol test at screening and at Day -1.

19 Participants who had an average weekly alcohol intake that exceeded 21 units per week or participants who were unwilling to stop alcohol consumption for the duration of the study (1 unit=12 oz or 360 mL of beer; 5 oz or 150 mL of wine; 1.5 oz or 45 mL of distilled spirits).

20 Smoker of more than 5 cigarettes/day or equivalent use of nicotine products during the previous 3 months from the day of screening.

21 Currently pregnant[[1]](#footnote-1), breastfeeding, or lactating women.

22 Any subject who planned to undergo elective surgery within 4 weeks before Visit 3 (Day 1) through the end of the study (Day 85).

23 Any subject who had donated blood or in any other way had a loss of blood volume greater than 400 mL within 30 days before beginning the study IP administration.

24 Any subject who was unwilling to reside in the clinic during the study period or was unwilling to cooperate fully with the Investigator or designee.

- Women of childbearing age must have a negative pregnancy test prior to administration of benralizumab and use highly effective contraception until 16 weeks after dosing.

**Supplementary Table 1.** Disallowed concomitant medications during the on-study period (safety analysis set).

|  | **Number (%) of participants** | | | |
| --- | --- | --- | --- | --- |
| **ATC classification** | **Benralizumab  10 mg  (N=12)** | **Benralizumab  30 mg  (N=12)** | **Benralizumab  100 mg  (N=12)** | **Total  (N=36)** |
| **Number of participants with disallowed concomitant medicationsa** | 1 (8.3) | 2 (16.7) | 1 (8.3) | 4 (11.1) |
| Emollients and protectives | 1 (8.3) | 0 | 0 | 1 (2.8) |
| First-generation cephalosporins | 0 | 0 | 1 (8.3) | 1 (2.8) |
| H2-receptor antagonists | 0 | 1 (8.3) | 0 | 1 (2.8) |
| Herbal expectorants and emollients | 0 | 1 (8.3) | 0 | 1 (2.8) |
| Other antiemetics | 0 | 0 | 1 (8.3) | 1 (2.8) |
| Other systemic antihistamines | 0 | 1 (8.3) | 0 | 1 (2.8) |
| Other opioids | 0 | 0 | 1 (8.3) | 1 (2.8) |
| Other throat preparations | 0 | 1 (8.3) | 0 | 1 (2.8) |
| Propionic acid derivatives | 0 | 1 (8.3) | 0 | 1 (2.8) |
| Propulsives | 0 | 0 | 1 (8.3) | 1 (2.8) |
| Sympathomimetics | 0 | 1 (8.3) | 0 | 1 (2.8) |
| Tetanus vaccines | 0 | 1 (8.3) | 0 | 1 (2.8) |

ATC, Anatomical Therapeutic Chemical; N, number of participants in treatment group; WHO, World Health Organization.

On-study period started on the date of the injection of benralizumab and ended on the date of study completion or date of withdrawal from the study.

a Disallowed medication assessed by Sponsor medical review.

Medications were coded according to WHO Drug Dictionary version 2019-03.

A medication was regarded as concomitant if the start date was on or after the date of first dose of study treatment, or if it was started prior to the date of first dose of study treatment and was ongoing after the date of first dose of study treatment. Participants with multiple medications were counted only once for each ATC classification.

**Supplementary Table 2.** PK parameters of benralizumab from this study and the AMES studya (non-compartmental analysis).

| **Region/Study** | | **Dose**  **(mg)** | **Cmax**  **(ng/mL)** | **tmax**  **(day)** | **t1/2**  **(day)** | **AUC0-∞**  **(ng*day/mL)** | **AUC0-t**  **(ng*day/mL)** | **CL/F**  **(mL/day)** | **Vz/F**  **(L)** |
| --- | --- | --- | --- | --- | --- | --- | --- | --- | --- |
| **Study** | **China PK**  **(50-100kg)** | **30**  **(N=12)** | 1879.6  (28.7) | 7.0  (5-12) | 14.4  (30.1) | 69791.6  (28.8) | 67069.2  (27.3) | 429.9  (28.8) | 8.91  (34.5) |
| **AMES**  **(55-100kg)** | **30**  **(N=30)** | 1909  (28.0) | 5.02  (1-14) | 19.04  (25.9) | 70340  (27.5) | 59780  (24.0) | 426.5  (27.5) | 11.72 (25.4) |

APFS, accessorized prefilled syringe; AUC0-∞ area under the concentration-time curve from 0 to infinity; AUC0-t, area under the concentration-time curve from 0 to the last measurable time point; CL/F, apparent clearance; Cmax, maximum observed concentration; CV%, coefficient of variation expressed in percentage; N, number of participants in treatment group; n, number of participants included in analysis; PK, pharmacokinetic; t1/2, time for concentration to decrease by 50%; tmax, time to maximum observed concentration; Vz/F, apparent volume of distribution at terminal phase.

All data are presented as Geometric mean (Geometric CV%), except for tmax, which is presented as Median (min-max).

Two participants in China PK study did not have PK assessments beyond Day 30 and Day 33, respectively, and therefore were excluded from the calculations of AUC0-t, AUC0-∞, t1/2, CL/F, Vz/F.

a Data included are only for 30 mg SC by APFS in the upper arm.

**Supplementary Figure 1.** *Post hoc* analysis showing the geometric mean serum concentration-time profile (linear scale) of benralizumab following a single 30 mg SC dose administration in healthy Chinese and Western participants, from this study and the AMES study.

Sample size and AMES-APFS subgroup details to be added

Benralizumab Concentraion, Geometric Mean (ng/mL)

**Time after dosing (days)**

APFS, accessorized prefilled syringe; SD, standard deviation.

ChinaPK refers to data generated from this study.

AMES-APFS data for the 30 mg dose group in the APFS upper arm of AMES.

AMES study: Martin UJ et al. J Asthma. 2021 Jan;58(1):93-101.

Vertical line represents the Geometric mean ± SD=exp{mean(individual log-transformed values) ± SD (individual log-transformed values)}.

1. [↑](#footnote-ref-1)
